# Supplementary material for: A complete biomechanical model of Hydra contractile behaviors, from neural drive to muscle to movement
Source: PubMed Central journal article supplement — Proc Natl Acad Sci U S A. 2023 Mar 10;120(11):e2210439120. doi: 10.1073/pnas.2210439120 (PMC10089167; doi:10.1073/pnas.2210439120), 2023-03-10
Supplement: pnas.2210439120.sapp.pdf [file pnas.2210439120.sapp.pdf]

1

## 2 **Supplementary Information for**

3 **A complete biomechanical model of *Hydra* contractile behaviors, from neuron to muscle to**  
4 **movement**

5 **Hengji Wang, Joshua Swore, Shashank Sharma, John R Szymanski, Rafael Yuste, Thomas L Daniel, Michael Regnier, Martha**  
6 **M Bosma, Adrienne L Fairhall**

7 **Adrienne L Fairhall.**

8 **E-mail: fairhall@uw.edu**

### 9 **This PDF file includes:**

- 10 Supplementary text
- 11 Figs. S1 to S11 (not allowed for Brief Reports)
- 12 Tables S1 to S5 (not allowed for Brief Reports)
- 13 Legends for Movies S1 to S2
- 14 SI References

### 15 **Other supplementary materials for this manuscript include the following:**

- 16 Movies S1 to S2

17 **Supporting Information Text**

18 **Single cell model details**

19 Here we give the details of the single cell model (Eq. 1 of the main text), and annotate their sources. Differential equations are  
20 solved using the Euler method with a step size of 0.2 ms.

21 **Expressions.**  $\text{Ca}^{2+}$  flux through IPR (1):

$$J_{\text{IPR}} = k_{\text{IPR}} \frac{C^2 P^2 R}{(C^2 + K_a^2)(P^2 + K_{\text{IP}}^2)} (S - C)$$

$$\frac{dR}{dt} = k_R \left( \frac{K_i^2}{K_i^2 + C^2} - R \right)$$

22  $\text{Ca}^{2+}$  flux leaking from ER (1):

$$J_{\text{leak}} = k_{\text{leak}}(S - C)$$

23  $\text{Ca}^{2+}$  flux through the SERCA pump (1):

$$J_{\text{SERCA}} = k_{\text{SERCA}} C$$

24  $\text{Ca}^{2+}$  flux through PMCA pump (1):

$$J_{\text{PMCA}} = k_{\text{PMCA}} C$$

25  $\text{Ca}^{2+}$  entry fluxes from the extracellular space (1):

$$J_{\text{in}} = v_{\text{in}} + v_r \frac{P^2}{K_r^2 + P^2}$$

26 Current through voltage-gated  $\text{Ca}^{2+}$  channels (2):

$$I_{\text{Ca}} = g_{\text{Ca}} m^2 h (V - E_{\text{Ca}})$$

$$\frac{dm}{dt} = \frac{m_{\infty} - m}{\tau_m}$$

$$\frac{dh}{dt} = \frac{h_{\infty} - h}{\tau_h}$$

$$m_{\infty} = \frac{1}{1 + \exp(-\frac{V+25}{10})}$$

$$\tau_m = \frac{0.001}{\exp(-\frac{V+23}{20}) + \exp(\frac{V+23}{20})} + 0.00005$$

$$h_{\infty} = \frac{1}{1 + \exp(\frac{V+28}{5})}$$

$$\tau_h = \frac{0.03}{\exp(-\frac{V}{20}) + \exp(\frac{V}{20})} + 0.021$$

27 Current through voltage-gated  $\text{K}^+$  channels (2):

$$I_{\text{K}} = g_{\text{K}} n^4 (V - E_{\text{K}})$$

$$\frac{dn}{dt} = \frac{n_{\infty} - n}{\tau_n}$$

$$n_{\infty} = \frac{1}{1 + \exp(-\frac{V+18.5}{23})}$$

$$\tau_n = \frac{0.0015}{\exp(-\frac{V+10}{25}) + \exp(\frac{V+10}{25})} + 0.015$$

28 Leak current:

$$I_{\text{L}} = g_{\text{L}} (V - E_{\text{L}})$$

29 **Parameters.** The related parameters are shown in Table S1. Sensitivity analysis on parameters involved in the slow pathway  
 30 (Fig. S1) shows that our model is insensitive to the change of these parameters in a large range ( $0.8\times - 1.2\times$ ). Parameter  
 31 sweeping on the two major factors of the fast pathway,  $g_{Ca}$  and  $g_K$  (Fig. S2), shows that they are affecting the equilibrium  
 32 of the action potential (AP), and in a large range of the combination of values of  $g_{Ca}$  and  $g_K$ , a post-stimulation AP can be  
 33 triggered, of which the lag time is smoothly changing with the parameter values.

34 **Calcium fluxes and ion currents.** Fig. S3 includes the supplementary plots of Fig. 3B and 3C of the main text, showing the  
 35 calcium fluxes and ion currents related to the dynamics.

36 **Equilibrium requirements.** To maintain the cell in the equilibrium state with no external stimulation, several equilibrium  
 37 conditions need to be held at the initiation.

38 The equilibrium of membrane currents:

$$I_{Ca} + I_K + I_L = 0$$

39 The equilibrium of  $Ca^{2+}$  fluxes through the cell membrane:

$$J_{in} - J_{PMCA} - \alpha I_{Ca} = 0$$

40 The equilibrium of  $Ca^{2+}$  fluxes through the ER membrane:

$$J_{IPR} + J_{leak} - J_{SERCA} = 0$$

41 Initial values of the dynamical variables are set as equilibrium values of these equations.

## 42 Multicellular model details

43 **Calibration of the size of muscle sheets.** To simulate calcium signaling in the whole-body muscle sheets, we construct ectodermal  
 44 and endodermal networks of *Hydra* epitheliomuscular cells. The number of muscle cells of *Hydra* varies considerably with  
 45 body size (3). For a representative *Hydra* of length of 1.38 mm, we counted 62 cells longitudinally and 30 ( $15\times 2$ ) - 34 ( $17\times 2$ )  
 46 cells circumferentially, depending on the longitudinal location (Fig. S4). We approximate the body column as a cylinder  
 47 composed of  $30\times 60$  square cells, of which the side length is  $30\ \mu\text{m}$ ; the lateral sheet edges are connected and the topmost and  
 48 bottommost cell rows are taken to be isolated from the environment. Cells within a layer are connected to their neighbours via  
 49 gap junctions.

50 **Effects of stimulation strength on wave propagation.** As shown in Table S1, we set the stimulation strength of the slow pathway  
 51 ( $v_{PLC\beta}$ ) as  $1.0\ \mu\text{M/s}$  and that of the fast pathway ( $I_{stim}$ ) as  $0.02\ \text{mA/cm}^2$ . To explore how these values affect the results, we  
 52 sweep them over an order of magnitude ( $0.1 - 1.0$  for the slow wave;  $0.004 - 0.04$  for the fast wave) and plot how these inputs  
 53 influence the longitudinal  $[Ca^{2+}]$  propagation, given stimulation of a local ( $2\times 2$  cells) domain at the center of a  $30\times 60$  muscle  
 54 sheet (Fig. S5). The wavefront index is defined as the maximum index of cells whose  $[Ca^{2+}]$  concentration is higher than a  
 55 threshold ( $0.055\ \mu\text{M}$ ). The results show a clear phase transition of fast wave propagation when  $I_{stim}$  is between  $0.016 - 0.02$   
 56  $\text{mA/cm}^2$ , which does not appear in the slow wave.

57 When the stimulation strengths are small, both the slow pathway and fast pathway propagate in a form of diffusion (not  
 58 shown); when the strengths are large, the slow pathway gradually exhibits a diffusive-wave propagation pattern, while the fast  
 59 pathway suddenly transitions to a regenerative-wave propagation pattern when the input strength exceeds a threshold.

60 **Effects of gap-junctional coupling coefficients on wave propagation.** We explore the effects of the gap-junctional coupling  
 61 coefficients  $g_{IP_3}$  and  $g_c$  (in units of  $\text{s}^{-1}$ ) by tuning their values along with longitudinal and circular directions and visualizing  
 62 how they will affect the propagation range of the slow waves and the propagation speed of the fast waves, with the values of all  
 63 other parameters fixed. Both are again initiated by stimulating a domain of  $2\times 2$  cells at the center of a  $30\times 60$  muscle sheet  
 64 (Fig. S6). In both cases, a larger coupling coefficient facilitates the propagation in that direction, and reduces the propagation  
 65 in the orthogonal direction. The default values used in our simulation are:  $g_c = 1000\ \text{s}^{-1}$  for both longitudinal and circular  
 66 directions;  $g_{IP_3} = 2\ \text{s}^{-1}$  for the longitudinal direction and  $0.1\ \text{s}^{-1}$  for the circular direction.

67 The reason that use different criteria to measure the slow and fast waves is due to the different natures between them: the  
 68 amplitude of slow wave is significantly decaying with the propagation distance and ceases at some point, and we found the  
 69 average speed (which is strongly affected by how we set the threshold to define wavefront) is not a good metric to measure the  
 70 strength of wave propagation, instead, the farthest wavefront which shows “how far” the wave can propagate can perfectly  
 71 reflect that; as for the fast wave, since it’s global which means it finally activates all cells, the farthest wavefront is just the  
 72 border of the sheet which is trivial, so the speed which shows “how fast” the wave can reach the border plays a good metric.

73 **Effects of intracellular parameters on wave propagation.** Besides the coupling coefficients, some intracellular parameters that  
74 influence the strength or duration of the calcium dynamics can also affect wave propagation. We select some significant  
75 parameters here and explore their effects by sweeping them and measure the effects on propagation range (slow wave) or speed  
76 (fast wave) along the longitudinal direction under local stimulation ( $2 \times 2$  cells at the center) (Fig. S7), with all other parameters  
77 fixed. Fig. S7A shows that both larger  $k_{\text{IPR}}$  or smaller  $k_{\text{deg}}$  can make the wave propagate farther – this is expected as a larger  
78  $k_{\text{IPR}}$  indicates a larger calcium release from ER stores when IPR is activated by  $\text{IP}_3$ , and a smaller  $k_{\text{deg}}$  means the  $\text{IP}_3$  decays  
79 more slowly. Both effects will cause stronger calcium dynamics and facilitate wave propagation. Fig. S7B shows that increasing  
80 either  $k_{\text{SERCA}}$  or  $k_{\text{PMCA}}$  limits the maximum wave range, which is again reasonable since both factors are proportional to the  
81 extent that  $\text{Ca}^{2+}$  is recycled ( $k_{\text{SERCA}}$ ) or extruded ( $k_{\text{PMCA}}$ ) from the cytosol; therefore their increase results in a reduction in  
82 cytosolic  $\text{Ca}^{2+}$  concentration and hinders wave propagation. Fig. S7C shows larger  $g_{\text{Ca}}$  greatly facilitates the propagation  
83 speed of the fast wave, which can be due to the increase of  $\text{Ca}^{2+}$  influx from the extracellular space; larger  $g_{\text{K}}$  can increase the  
84  $\text{Ca}^{2+}$  efflux from the cytosol to extracellular space, thus reducing the strength of the calcium dynamics and hindering fast wave  
85 propagation.

## 86 Force generation model details

87 As given in Eq. 2 in the main text, we use the Hai-Murphy model to transform the  $\text{Ca}^{2+}$  dynamics into contracting stress  
88 patterns, and set different parameters for the ectoderm (phasic muscle) and endoderm (tonic muscle). The details of these  
89 parameters are shown in Table S2. Parameters are tuned to fit the length change of the model to that of the corresponding  
90 measured *Hydra*, based on the ranges and values provided in (4) and (5).

## 91 Biomechanics details

92 The parameters of our biomechanical model, constructed in COMSOL Multiphysics<sup>®</sup> 5.3a, are shown in Table S3. The  
93 configurations of the solver are shown in Table S4. An additional example simulation result with a different neural drive is  
94 shown in Fig. S8.

## 95 Effects of parameter variations on length change

96 Fig. S9 shows how some key parameters can affect the length change of the model under a series of contraction pulse stimuli,  
97 with other parameters fixed. The stimulation train is extracted from measurements of real *Hydra*. These parameters are  
98 selected since they reflect pivotal physical properties that align with the focus of our model, and our simulation results match  
99 their definitions and the expectation: endodermal  $c_{\text{half}}$  represents the half-saturation  $[\text{Ca}^{2+}]_i$  for MLCK activation in endoderm,  
100 of which a larger value means a lower sensitivity of the response of endodermal stress to the calcium concentration, thus a  
101 smaller resistance of the body to the contraction (Fig. S9A); endodermal  $k_7$  represents the detachment rate of the latch-bridge  
102 state of endodermal myoneme, of which a larger value means a longer maintenance of contraction in endoderm, thus a longer  
103 time for the body to recover after contracted (Fig. S9B); endodermal  $K_F$  represents the stress strength that generated by per  
104 unit of latch bridge state ratio in the endoderm, of which a larger value means a stronger endodermal stress, thus a larger  
105 resistance of the body to the contraction, and such a relationship is linear, different from that of  $c_{\text{half}}$  (Fig. S9C); relaxation  
106 time represents the viscosity of the muscle material, of which a larger value means a stronger and slower resistance to and  
107 recovery from the stress caused deformation of the body (Fig. S9D). We preferably select the parameters of the endoderm for  
108 sensitivity analysis because the tonic property provides more variant and complex effects on the behaviors compare to the  
109 phasic ectoderm.

## 110 Model reduction

111 To explore the high-level properties of the biophysical model, we apply a pointwise (a domain of  $2 \times 2$  cells) pulse stimulation at  
112 the middle of the muscle sheet and plot the generated wave dynamics ( $[\text{Ca}^{2+}]_i$ ) along with the center longitudinal line for both  
113 slow and fast dynamics (Fig. S10A, B). Based on the plots, we propose a Green's function form for both slow and fast waves:

$$G(\rho, t) = A\Theta\left(t - \frac{\rho}{v}\right) \left(1 - e^{-\frac{t - \rho/v}{\tau_{\text{inc}}}}\right) e^{-\frac{t - \rho/v}{\tau_{\text{dec}}}} e^{-\frac{\rho}{\rho_c}}$$

114 where  $\Theta(\cdot)$  is the Heaviside function,  $\rho$  is the distance between a point and the source,  $t$  is the time since the stimulation,  $A$   
115 is the maximum amplitude constant,  $v$  is the velocity of the wave propagation,  $\tau_{\text{inc}}$  is the time constant of the increasing phase,  
116  $\tau_{\text{dec}}$  is the time constant of the decreasing phase,  $\rho_c$  is the scaling constant of the amplitude. To represent the anisotropy of  
117 the coupling coefficients of slow waves, we define the distance as  $\rho = \sqrt{(c_w x)^2 + y^2}$ , where  $x, y$  are the distance between the  
118 point and the source respectively in the circular and longitudinal direction,  $c_w$  is a warping coefficient that represents the  
119 anisotropy. Warping the space is equivalent to defining directional velocities but simpler to represent.

120 We fit the Green's function by sweeping over the key parameters ( $A, v, \tau_{\text{inc}}, \tau_{\text{dec}}, \rho_c$  and  $c_w$ ) to match some selected targets:  
121 we firstly select a point on the sheet, then sweep  $\tau_{\text{inc}}, \tau_{\text{dec}}$  and  $A$  to fit its amplitude and the time of its increasing and decreasing  
122 phases, by picking the combination that minimizes the difference between the Green's function and the biophysical model.  
123 Then we select two points that are far from each other, then sweep  $v, \rho_c$  and  $c_w$  to fit their time difference and amplitude  
124 difference, picking the pair that gives a closest result with the biophysical model. The optimized values of these parameters are

125 shown in Table S5, and the spatiotemporal pattern of the Green's function along with the center longitudinal line for the slow  
126 and fast dynamics are shown in (Fig. S10C, D).

127 Though the Green's function reproduces some characteristics of the biophysical model, its biggest limitation is it can only  
128 represent linear responses. However, our biophysical model includes strong nonlinearity in both single-cellular dynamics and  
129 the inter-cellular interactions. For instance, the refractory period of the action potential and the depletion of ER store make  
130 that when two fast waves or two slow waves collide with each other, they exhibit some extent of canceling (an example of the  
131 fast wave is shown in Fig. S11). Also, the wave-shapes of different cells differ a lot in the biophysical model simulation, so some  
132 parameters that are fitted with one or two arbitrary points are not generally accurate. Better simplification needs incorporating  
133 more nonlinearity and therefore greatly increases the problem complexity, and our attempt with Green's functions is a start  
134 that may inspire the future work.

## 135 **Supplementary results**

136 **Animation of the whole simulation pipeline.** A movie showing the simulation results from neural activity to behaviors (Movie S1),  
137 as a supplement of Fig. 7 in the main text.

138 **Simulated movement without assuming phasic and tonic muscle types.** A movie showing the simulated "contraction" of our  
139 model when we directly apply the transformed stress from calcium dynamics on the biomechanical model, without distinguishing  
140 the ectoderm and the endoderm with phasic/tonic muscle types (Movie S2).

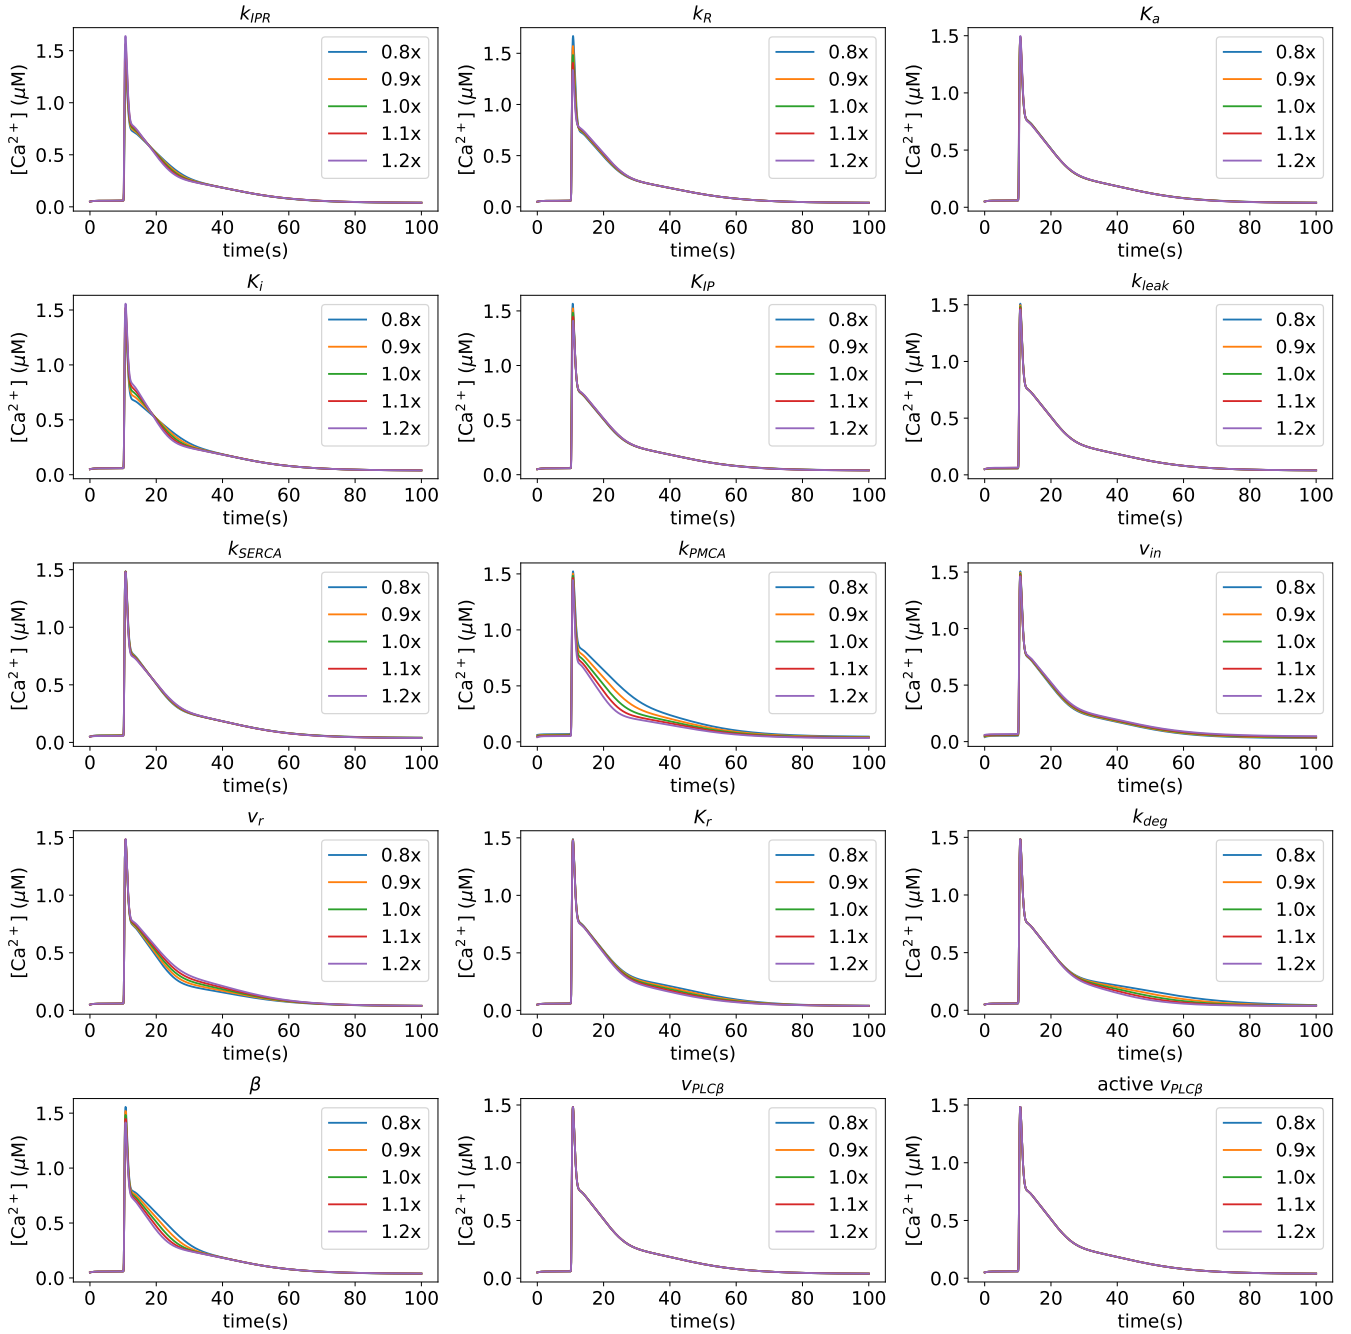

**Fig. S1.** Effects on  $[Ca^{2+}]$  by tuning parameters that are involved in a slow pathway. Each parameter is swept from  $0.8\times$  to  $1.2\times$  of the default value, with a step size as  $0.1\times$ . This shows the subtle variation in dynamics due to these parameter choices.

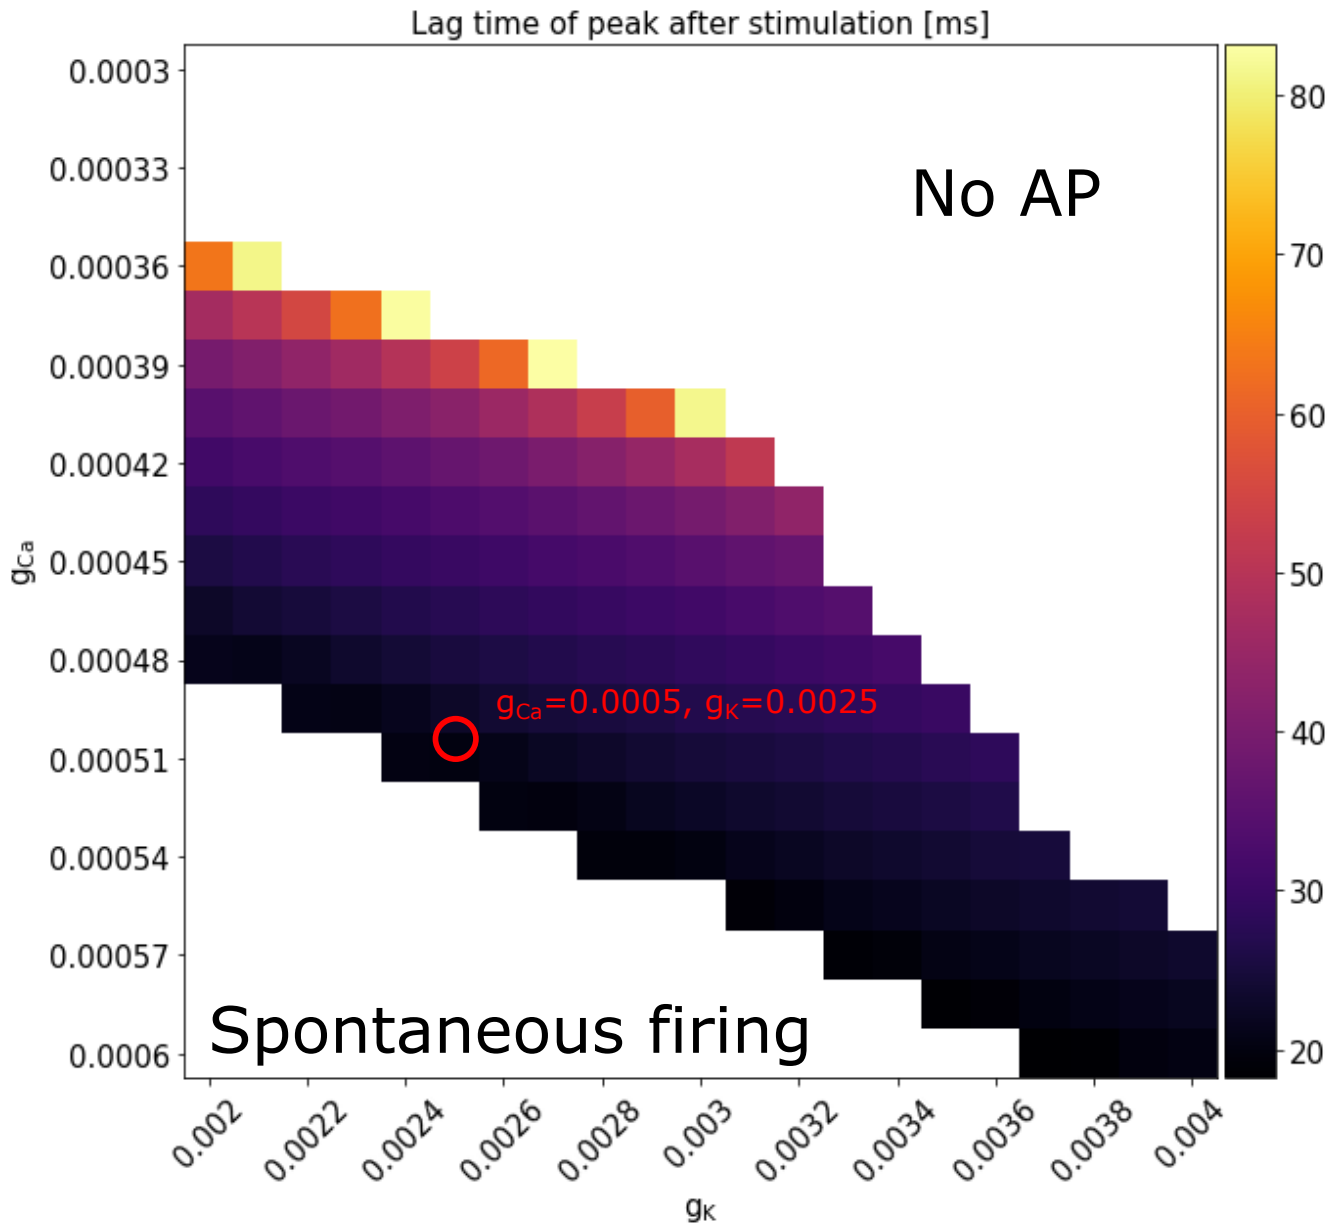

**Fig. S2.** Effects of different values of channel conductances  $g_{Ca}$  and  $g_K$  on the lag time of the action potential peak after the stimulation. The choice used in the final model is circled out, showing that there is a range of conductances that give rise to reasonable lag times.

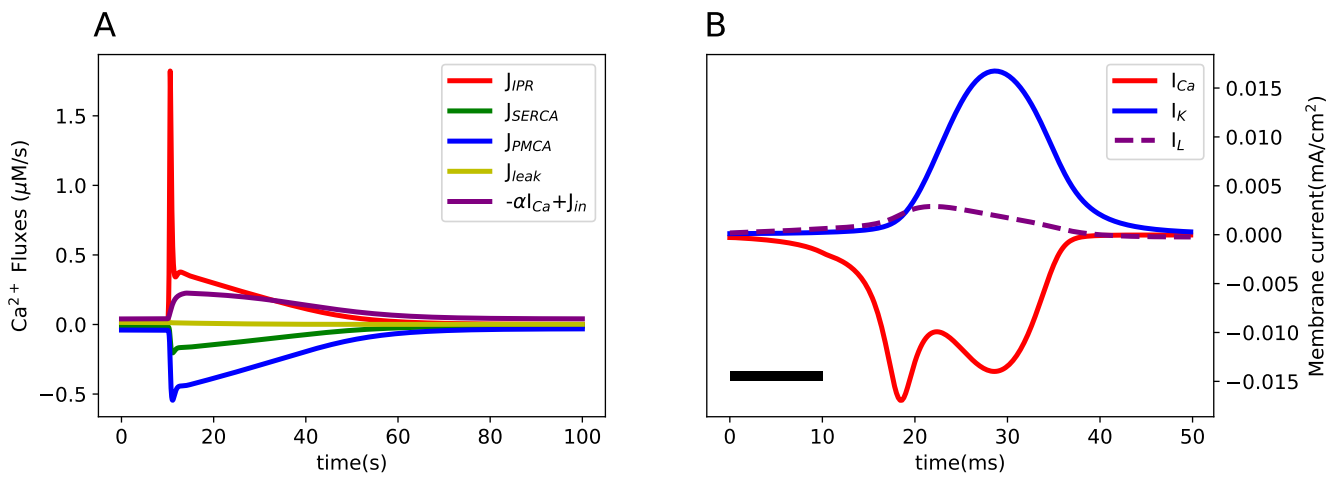

**Fig. S3.** Calcium fluxes (A) and ion currents (B), respectively correspond to Fig. 3A and Fig. 3B in the main text.



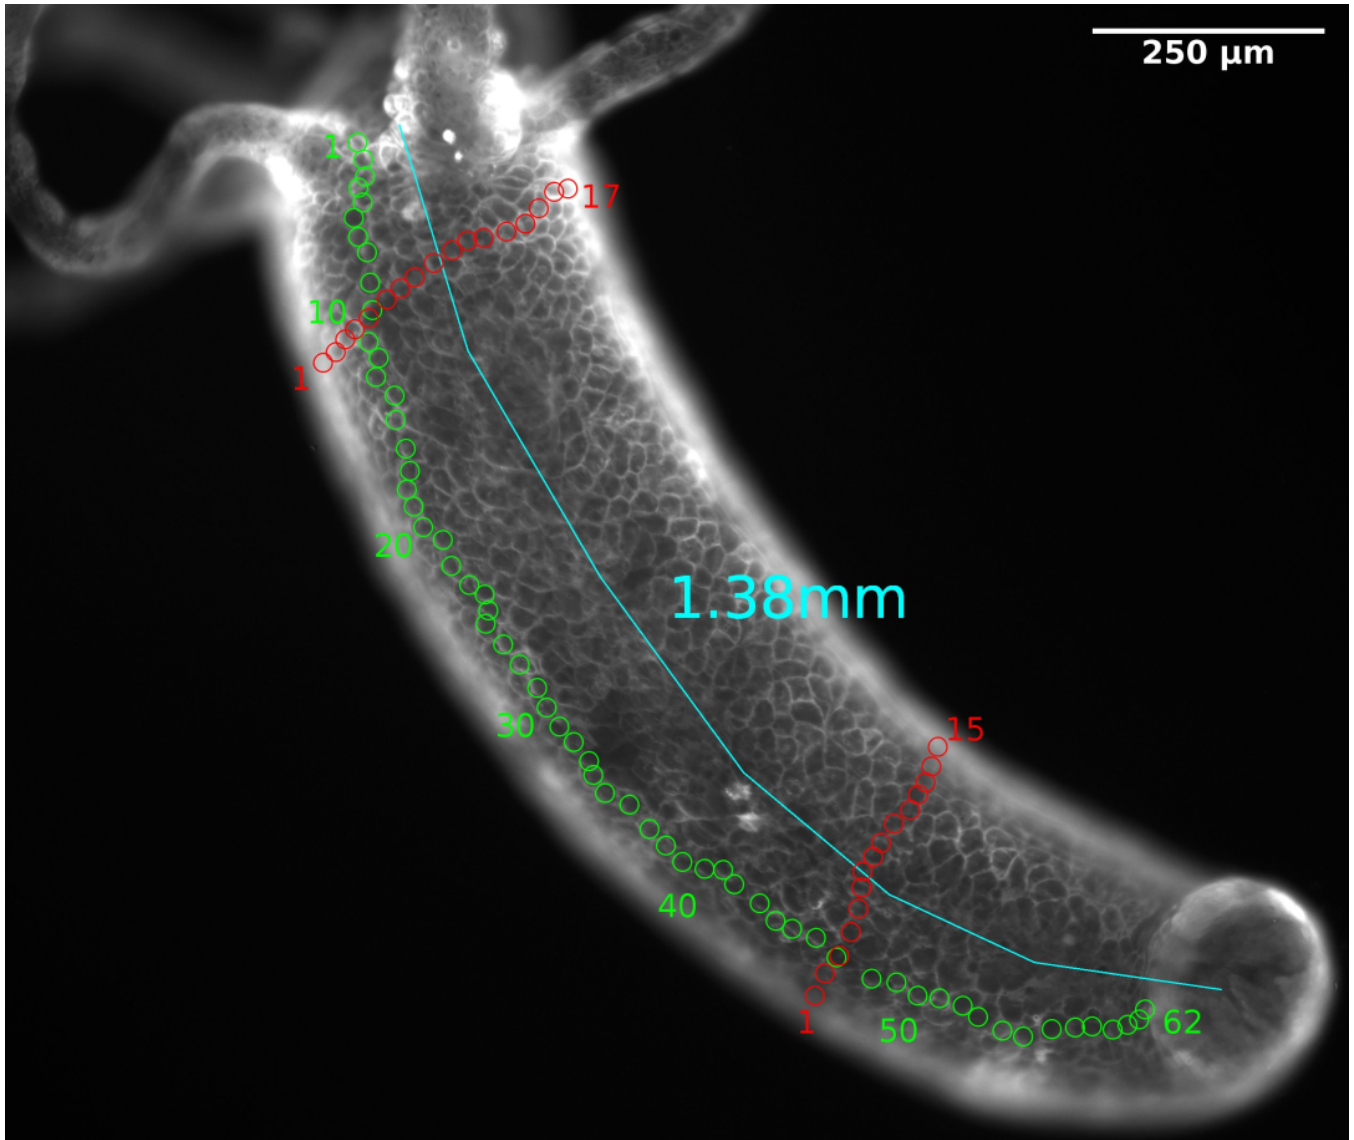

Fig. S4. Cell counting and length measurement in a small *Hydra*. Green circles are the counts in longitudinal direction and red colors are the counts in circumferential direction.

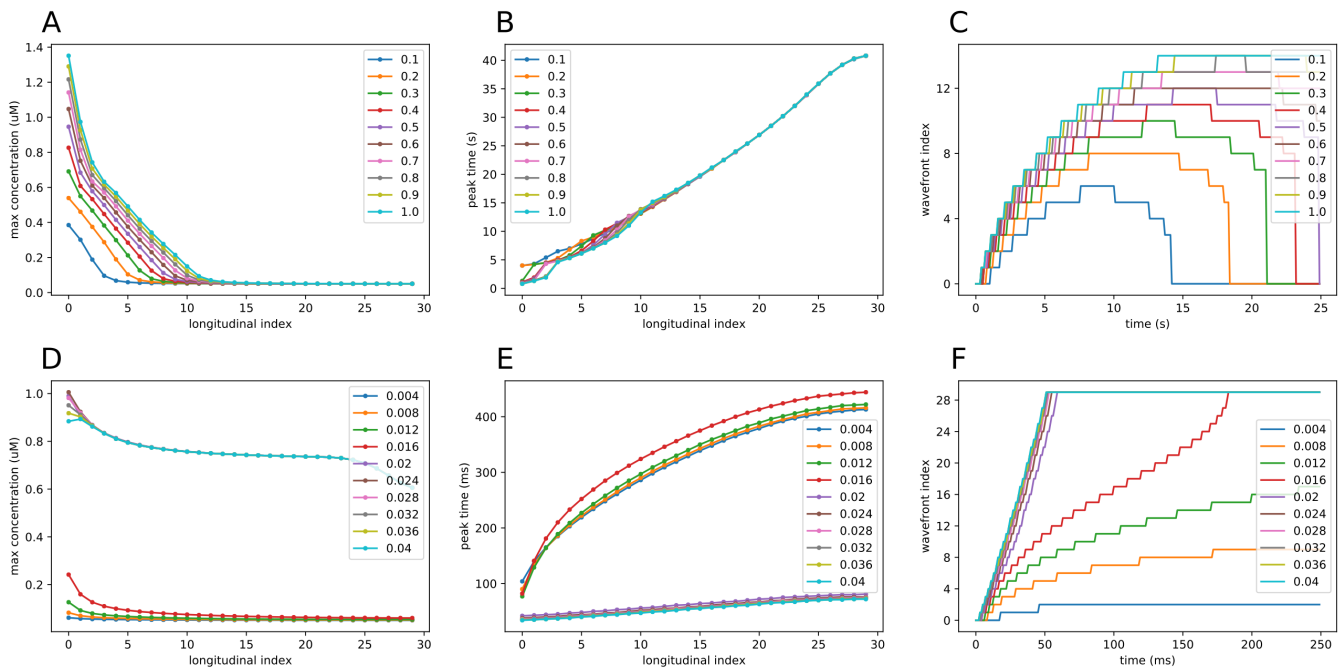

**Fig. S5.** Observables of  $[Ca^{2+}]$  propagation change with different stimulation strengths of the slow wave (A - C) and the fast wave (D - F), including the distribution of maximum concentration (amplitude) over longitudinal index (A, D), the arrival time of peaks versus the longitudinal index (B, E) and the wavefront index change over time (C, F).

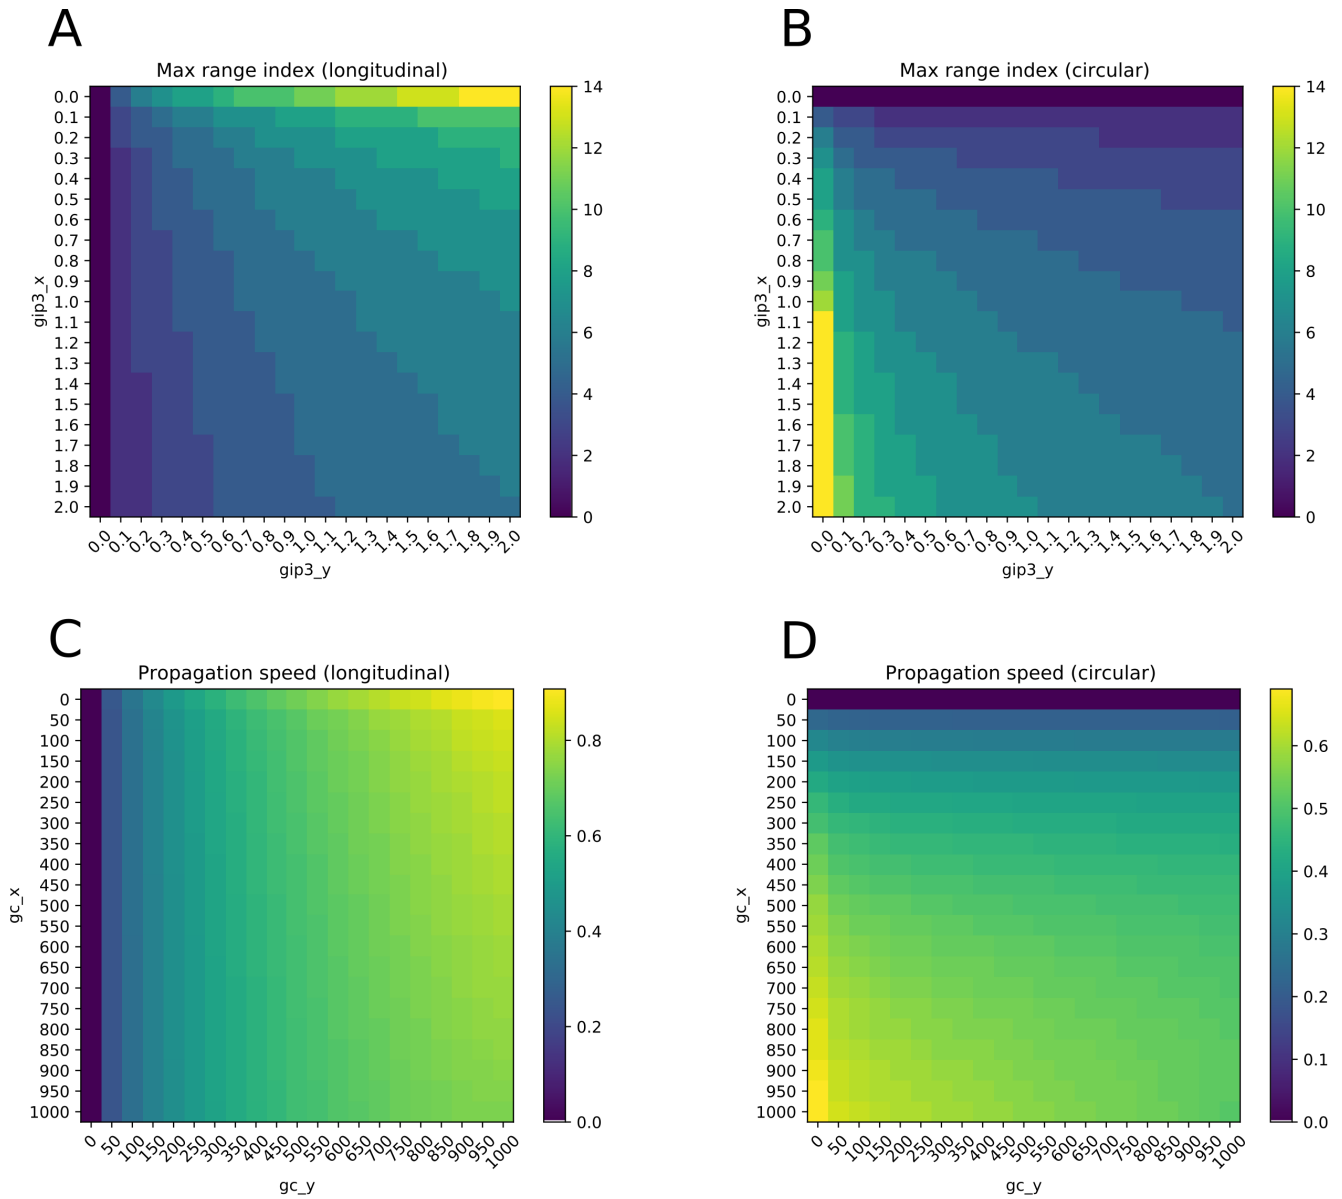

**Fig. S6.** Effects of gap-junctional coupling coefficients on wave propagation. (A) The effect of  $g_{IP3}$  on the longitudinal range of the slow wave. (B) The effect of  $g_{IP3}$  on the circular range of the slow wave. (C) The effect of  $g_c$  on the longitudinal propagation speed of the fast wave. (D) The effect of  $g_c$  on the circular propagation speed of the fast wave.

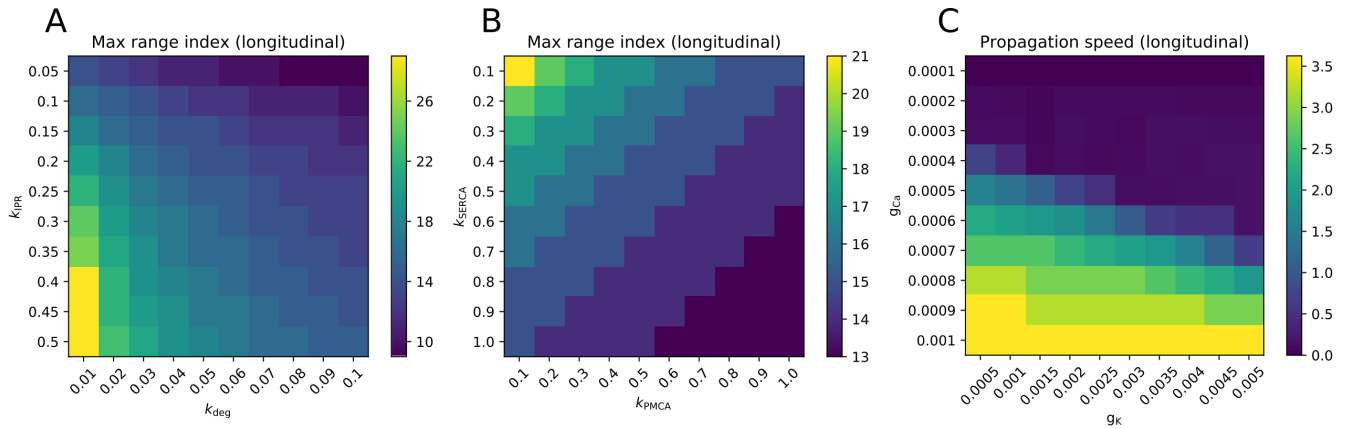

**Fig. S7.** Effects of intracellular parameters on wave propagation. (A) Effects of sweeping  $k_{IPR}$  and  $k_{deg}$  on the longitudinal range of the slow wave. (B) Effects of sweeping  $k_{SERCA}$  and  $k_{PMCA}$  on the longitudinal range of the slow wave. (C) Effects of sweeping  $g_{Ca}$  and  $g_K$  on the longitudinal propagation speed of the fast wave.

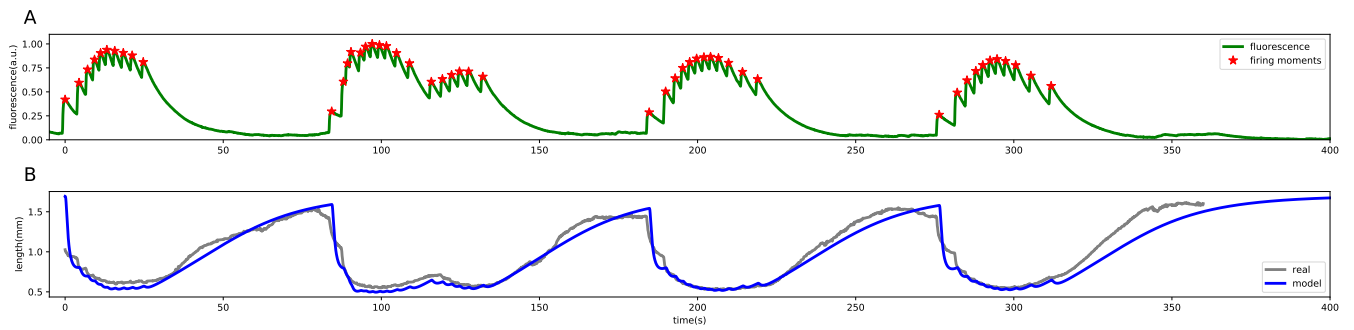

**Fig. S8.** Simulation following another video where two bursts are consecutive. (A) whole-frame fluorescence trace and neural firing moments; (B) comparison between length evolution of the model and the real *Hydra* in the video.

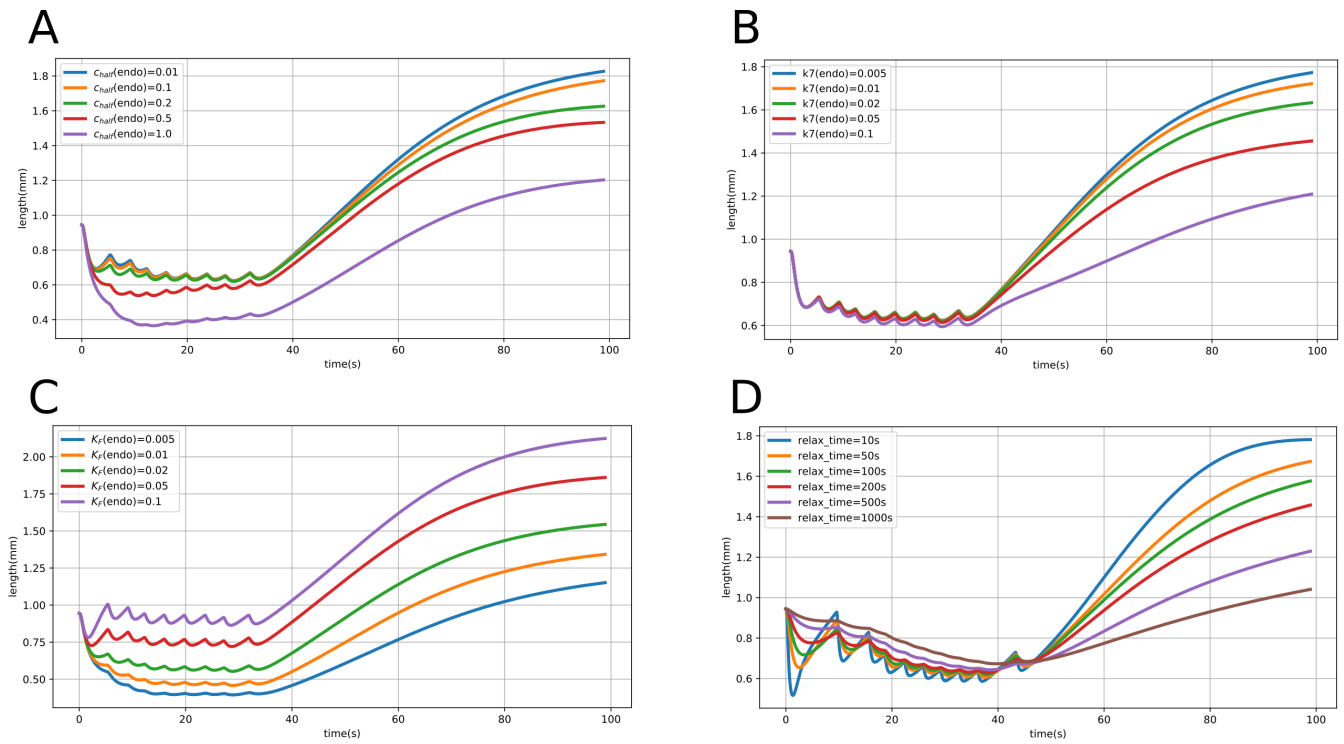

**Fig. S9.** Effect on the length change by sweeping different parameters: (A) Endodermal  $c_{half}$ ; (B) Endodermal  $k_7$ ; (C) Endodermal  $K_F$ ; (D) relaxation time (representing viscosity).

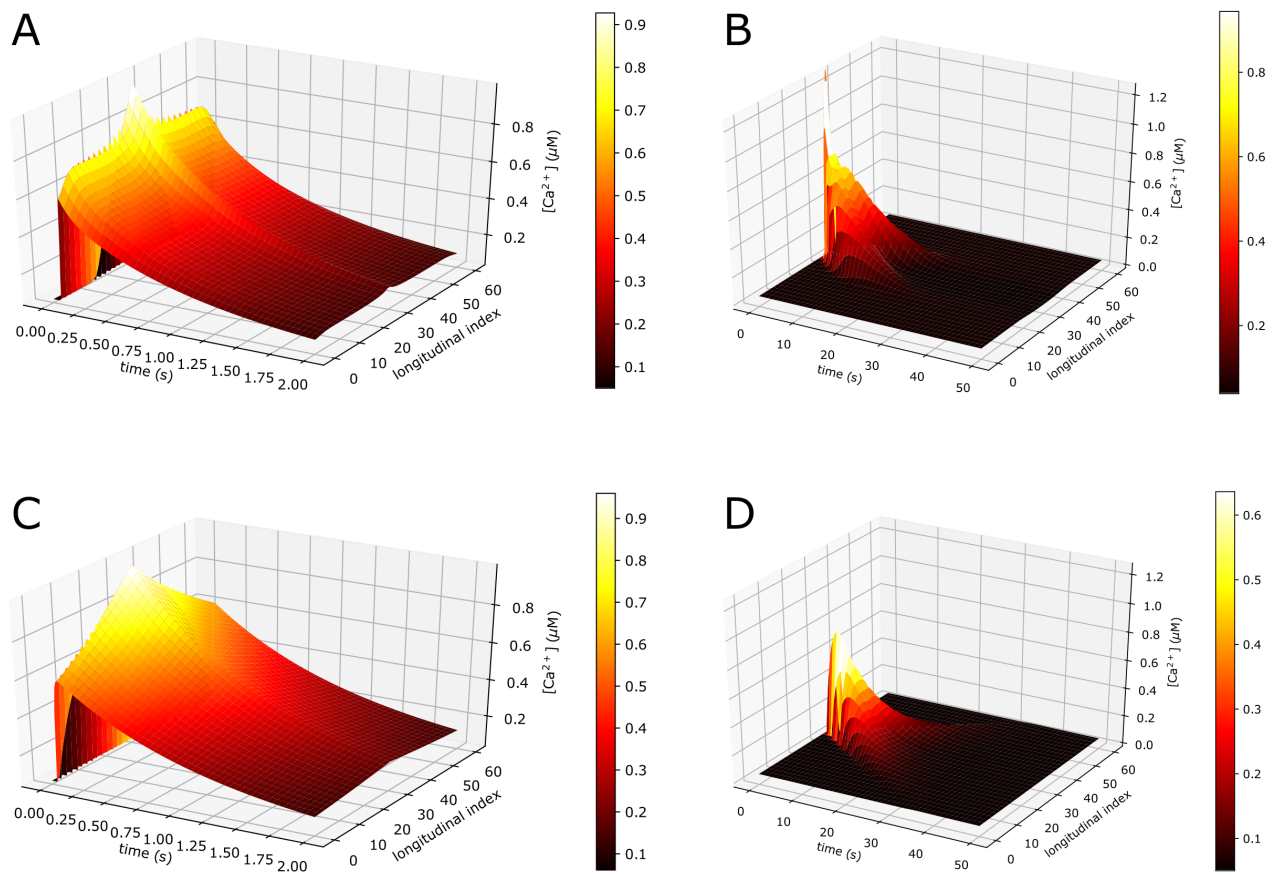

**Fig. S10.** Spatiotemporal pattern of the impulse response of the longitudinal center-line points in the biophysical model and Green's function. (A) Biophysical model response to a fast pathway stimulation. (B) Biophysical model response to a slow pathway stimulation. (C) Green's function of the fast wave. (D) Green's function of the slow wave.

**A**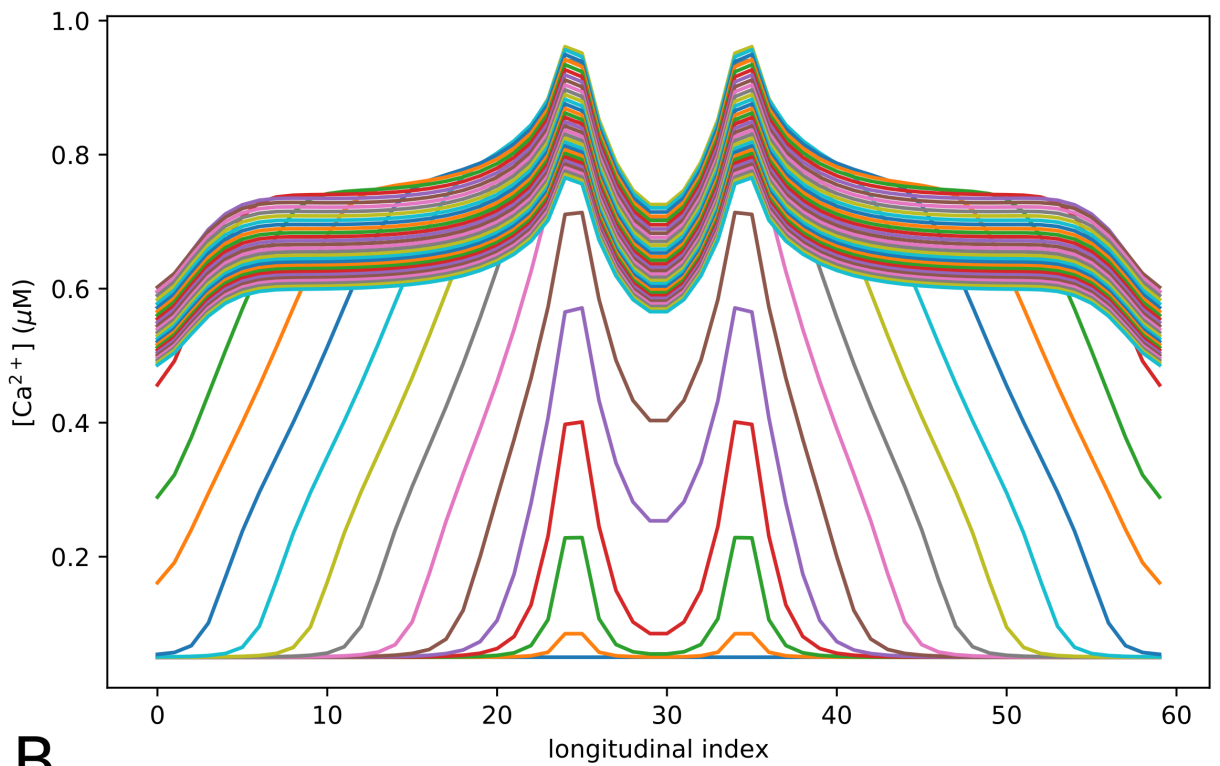**B**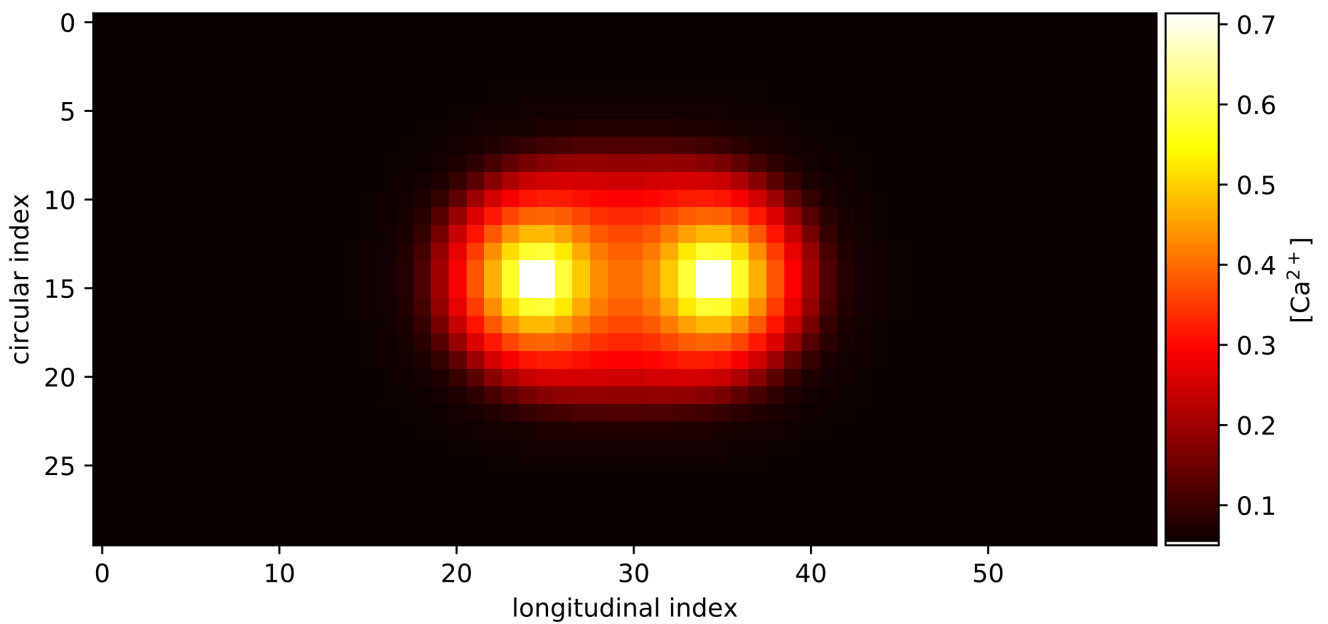

**Fig. S11.** Nonlinearity exhibited by the interaction of two pointwise-stimulated fast waves. (A) Traces showing how  $[Ca^{2+}]_i$  evolves, in which each curve represents a time point. (B) Snapshot of the muscle sheet at 25 ms after the stimulation, in which two waves cancel each other at the middle.



**Table S1. Parameters used in the single cell model**

| Parameter      | Description                                                       | Value       | Unit                    | Source |
|----------------|-------------------------------------------------------------------|-------------|-------------------------|--------|
| $k_{IPR}$      | Rate constant of $Ca^{2+}$ release through IPR                    | 0.2         | $s^{-1}$                | (1)*   |
| $k_R$          | Rate constant of IPR inactivation                                 | 4           | $s^{-1}$                | (1)    |
| $K_a$          | Half-saturation constant for $Ca^{2+}$ activation of IPR          | 0.2         | $\mu M$                 | (1)    |
| $K_i$          | Half-saturation constant for $Ca^{2+}$ inhibition of IPR          | 0.2         | $\mu M$                 | (1)    |
| $K_{IP}$       | Half-saturation constant for $IP_3$ activation of IPR             | 0.3         | $\mu M$                 | (1)    |
| $k_{leak}$     | Rate constant of $Ca^{2+}$ leak from ER                           | 0.0002      | $s^{-1}$                | (1)*   |
| $k_{SERCA}$    | Rate constant of SERCA pump                                       | 0.3         | $s^{-1}$                | (1)*   |
| $k_{PMCA}$     | Rate constant of PMCA pump                                        | 0.8         | $s^{-1}$                | (1)*   |
| $v_{in}$       | Rate of $Ca^{2+}$ leak across the plasma membrane                 | 0.04        | $\mu M/s$               | (1)*   |
| $v_r$          | Maximal rate of activation-dependent $Ca^{2+}$ influx             | 0.2         | $\mu M/s$               | (1)    |
| $K_r$          | Half-saturation constant for activation-dependent $Ca^{2+}$ entry | 1           | $\mu M$                 | (1)    |
| $v_{PLC\beta}$ | Rate of $PLC\beta$                                                | 0.002 - 1.0 | $\mu M/s$               | (1)*   |
| $k_{deg}$      | Rate constant of $IP_3$ degradation                               | 0.05        | $s^{-1}$                | (1)*   |
| $\alpha$       | Current conversion factor                                         | 5182.13     | $\mu M \cdot cm^2 / mC$ | (6)    |
| $\beta$        | Ratio of the volumes of cytoplasm and ER                          | 20          | 1                       | (1)    |
| $g_{Ca}$       | Maximal conductance of $I_{Ca}$                                   | 0.0005      | $S/cm^2$                | (6)*   |
| $E_{Ca}$       | Reversal potential of $I_{Ca}$                                    | 51          | mV                      | (6)    |
| $g_K$          | Maximal conductance of $I_K$                                      | 0.0025      | $S/cm^2$                | (6)*   |
| $E_K$          | Reversal potential of $I_K$                                       | -75         | mV                      | (6)    |
| $g_L$          | Conductance of $I_L$                                              | 0.000036    | $S/cm^2$                | *      |
| $E_L$          | Reversal potential of $I_L$                                       | -55         | mV                      | *      |
| $C_m$          | Membrane capacitance per unit area                                | 1           | $\mu F/cm^2$            | (6)    |
| $I_{stim}$     | Current through ligand-gated ion channels                         | 0 - 0.02    | $mA/cm^2$               | (6)    |

\* Modified or tuned in the physiological plausible range to match the time scales of single cellular dynamics and wave propagation. Detailed sensitivity analysis is discussed and shown in Fig. S1 and Fig. S2.

**Table S2. Parameters used in the modified Hai-Murphy model**

| Parameter               | Description                                              | Value                                             | Unit                   |
|-------------------------|----------------------------------------------------------|---------------------------------------------------|------------------------|
| $k_1$                   | Rate of $M \rightarrow Mp$                               | $\frac{C^{n_M}}{C_{\text{half}}^{n_M} + C^{n_M}}$ | $\text{s}^{-1}$        |
| $k_2$                   | Rate of $Mp \rightarrow M$                               | 0.15                                              | $\text{s}^{-1}$        |
| $k_3$                   | Rate of $A + Mp \rightarrow AMp$                         | 16 (ecto) / 0.4 (endo)                            | $\text{s}^{-1}$        |
| $k_4$                   | Rate of $AMp \rightarrow A + Mp$                         | 4 (ecto) / 0.05 (endo)                            | $\text{s}^{-1}$        |
| $k_5$                   | Rate of $AMp \rightarrow AM$                             | $k_2$                                             | $\text{s}^{-1}$        |
| $k_6$                   | Rate of $AM \rightarrow AMp$                             | $k_1$                                             | $\text{s}^{-1}$        |
| $k_7$                   | Rate of $AM \rightarrow A + M$                           | 0.75 (ecto) / 0.015 (endo)                        | $\text{s}^{-1}$        |
| $c_{\text{half}}^{n^M}$ | Half-saturation $[\text{Ca}^{2+}]_i$ for MLCK activation | 0.85 (ecto) / 0.15 (endo)                         | $\mu\text{M}$          |
| $n^M$                   | Hill coefficient of $\text{Ca}^{2+}$ activation of MLCK  | 4                                                 | 1                      |
| $K_F$                   | Proportional coefficient of active stress generation     | 3.3 (ecto) / 0.3 (endo)                           | $\text{N}/\text{mm}^2$ |

**Table S3. Parameters used in the COMSOL model**

| Parameter                          | Value  | Unit                   |
|------------------------------------|--------|------------------------|
| Top half sphere radius             | 97.5   | $\mu\text{m}$          |
| Bottom half sphere radius          | 97.5   | $\mu\text{m}$          |
| Body cylinder height               | 650    | $\mu\text{m}$          |
| Thickness                          | 19.5   | $\mu\text{m}$          |
| Density of Enclosed Fluid          | 1000   | $\text{kg}/\text{m}^3$ |
| Density of Muscle                  | 1200   | $\text{kg}/\text{m}^3$ |
| Lamé parameter $\mu$ of Muscle     | 3.336  | kPa                    |
| Lamé parameter $\lambda$ of Muscle | 1.664  | GPa                    |
| Initial bulk modulus of muscle     | 1.667  | GPa                    |
| Relaxation time of muscle          | 70     | s                      |
| Temperature                        | 293.15 | K                      |
| Time step                          | 0.1    | s                      |

**Table S4. COMSOL solver configurations**

| Option                                                 | Value                   |
|--------------------------------------------------------|-------------------------|
| Time stepping method                                   | BDF                     |
| Steps taken by solver                                  | Intermediate            |
| Initial step                                           | 0.001 s                 |
| Maximum step                                           | 0.1 s                   |
| Maximum BDF order                                      | 2                       |
| Minimum BDF order                                      | 1                       |
| Event tolerance                                        | 0.01                    |
| Nonlinear controller                                   | True                    |
| Singular mass matrix                                   | Maybe                   |
| Consistent initialization                              | Backward Euler          |
| Fraction of initial step fore Backward Euler           | 0.001                   |
| Error estimation                                       | Exclude algebraic       |
| Absolute tolerance global method                       | Scaled                  |
| Tolerance method                                       | Factor                  |
| Tolerance factor                                       | 0.05                    |
| Update scaled absolute tolerance                       | True                    |
| Solver                                                 | MUMPS                   |
| Memory allocation factor                               | 1.2                     |
| Preordering algorithm                                  | Automatic               |
| Row preordering                                        | True                    |
| Reuse preordering                                      | True                    |
| Use pivoting                                           | On                      |
| Pivot threshold                                        | 0.1                     |
| Out-of-core                                            | Automatic               |
| Memory fraction for out-of-core                        | 0.99                    |
| In-core memory method                                  | Automatic               |
| Minimum in-core memory                                 | 512 MB                  |
| Used fraction of total memory                          | 0.8                     |
| Internal memory usage factor                           | 3                       |
| Check error estimate                                   | Automatic               |
| Factor in error estimate                               | 400                     |
| Iterative refinement                                   | True                    |
| Maximum number of refinements                          | 15                      |
| Matrix symmetry                                        | Automatic               |
| Matrix format                                          | Automatic               |
| Row equilibration                                      | True                    |
| Null-space function                                    | Automatic               |
| Orthonormal block limit                                | 10000000                |
| Store last residual                                    | Off                     |
| Solver log                                             | Normal                  |
| Log sampling (wall-clock)                              | 0.005 s                 |
| Assembly block size                                    | 1000                    |
| Stop when undefined mathematical operation is detected | True                    |
| Nonlinear method                                       | Constant (Newton)       |
| Damping factor                                         | 1                       |
| Limit on nonlinear convergence rate                    | 0.9                     |
| Jacobian update                                        | On every iteration      |
| Termination technique                                  | Iterations or tolerance |
| Number of iterations                                   | 1                       |
| Tolerance factor                                       | 0.1                     |

**Table S5. Parameters of Green's function after fitting**

| Parameter           | Value (fast) | Value (slow) | Unit          |
|---------------------|--------------|--------------|---------------|
| $A$                 | 0.9843       | 5.7737       | $\mu\text{M}$ |
| $v$                 | 731          | 0.9          | cell/s        |
| $\tau_{\text{inc}}$ | 0.008        | 9.3          | s             |
| $\tau_{\text{dec}}$ | 1.01         | 3.9          | s             |
| $\rho_c$            | 55           | 5.2          | $\mu\text{M}$ |
| $c_w$               | 1            | 4.9          | 1             |

141 **Movie S1. Simulation results from neural activity to muscle dynamics to behaviors.**

142 **Movie S2. Simulation results from directly applying the transformed stress on the biomechanical model**  
143 **without distinguishing phasic/tonic muscle types.**

## 144 **References**

- 145 1. T Höfer, L Venance, C Giaume, Control and plasticity of intercellular calcium waves in astrocytes: a modeling approach. *J.*  
146 *Neurosci.* **22**, 4850–4859 (2002).
- 147 2. PM Diderichsen, SO Göpel, Modelling the electrical activity of pancreatic  $\alpha$ -cells based on experimental data from intact  
148 mouse islets. *J. biological physics* **32**, 209–229 (2006).
- 149 3. CN Tzouanas, S Kim, KN Badhiwala, BW Avants, JT Robinson, Hydra vulgaris shows stable responses to thermal  
150 stimulation despite large changes in the number of neurons. *Iscience* **24**, 102490 (2021).
- 151 4. S Han, et al., Evidence for absence of latch-bridge formation in muscular saphenous arteries. *Am. J. Physiol. Circ. Physiol.*  
152 **291**, H138–H146 (2006).
- 153 5. M Yochum, J Laforêt, C Marque, An electro-mechanical multiscale model of uterine pregnancy contraction. *Comput.*  
154 *biology medicine* **77**, 182–194 (2016).
- 155 6. C Mahapatra, KL Brain, R Manchanda, A biophysically constrained computational model of the action potential of mouse  
156 urinary bladder smooth muscle. *PloS one* **13** (2018).
